# Supplementary material
Source: PubMed Central journal article supplement (PMC4476386)
Supplement: NIHMS670946-supplement-1.pdf [file NIHMS670946-supplement-1.pdf]

## Supplementary Information

### Supplementary Figures

Supplementary Figure 1

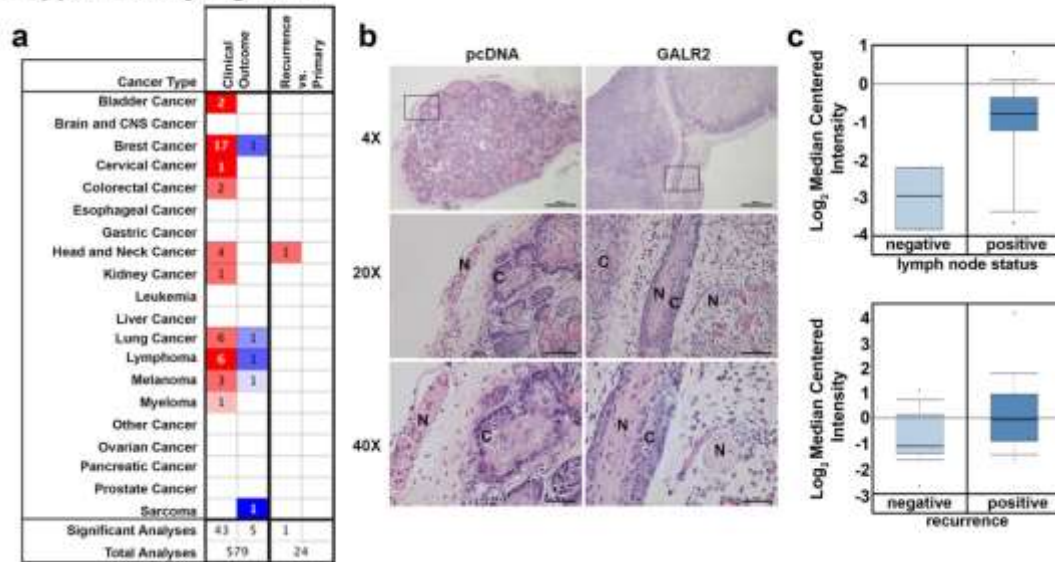

**Supplementary Figure 1. GAL predicts clinical outcome in multiple cancer types.** (a) Overexpression of GAL was correlated with poor clinical outcome in 43 analyses across multiple cancer types in the OncoPrint™ database and in recurrent tumours versus primary HNSCC (Red = high expression, blue = low expression. Relative intensity indicates degree of over- or underexpression). Some of the analyses represent the same patients at different time points (e.g. 1, 3 and 5 years). (\* $P < 0.05$ , two sample t-test and a fold-change threshold of 1.5 were used). (b) Low and high power photomicrographs of Fig. 1a showing PNI (N=nerve, C=cancer). (scale bars: 4X = 500 $\mu$ m, 20X = 100 $\mu$ m, 40X = 50 $\mu$ m). (c) GAL overexpression is significantly correlated with positive lymph node status (top graph, from TCGA, National Cancer Institute) and recurrence (lower graph, from the Ginos Head-Neck study) of HNSCC. <http://cancerres.aacrjournals.org/content/64/1/55.long>

Description of Ginos study (from OncoPrint): Forty one (41) HNSCC and 13 buccal mucosa samples were analysed on Affymetrix U133A microarrays. Sample data includes type, age, angiolymphatic invasion, differentiation, lymph node status, N-stage, perineural invasion, primary/recurrent, sex, site, stage and T-stage. Array Type: Human Genome U133A Array, measured 12,624 genes, 22283 reporters.

## Supplementary Figure 2

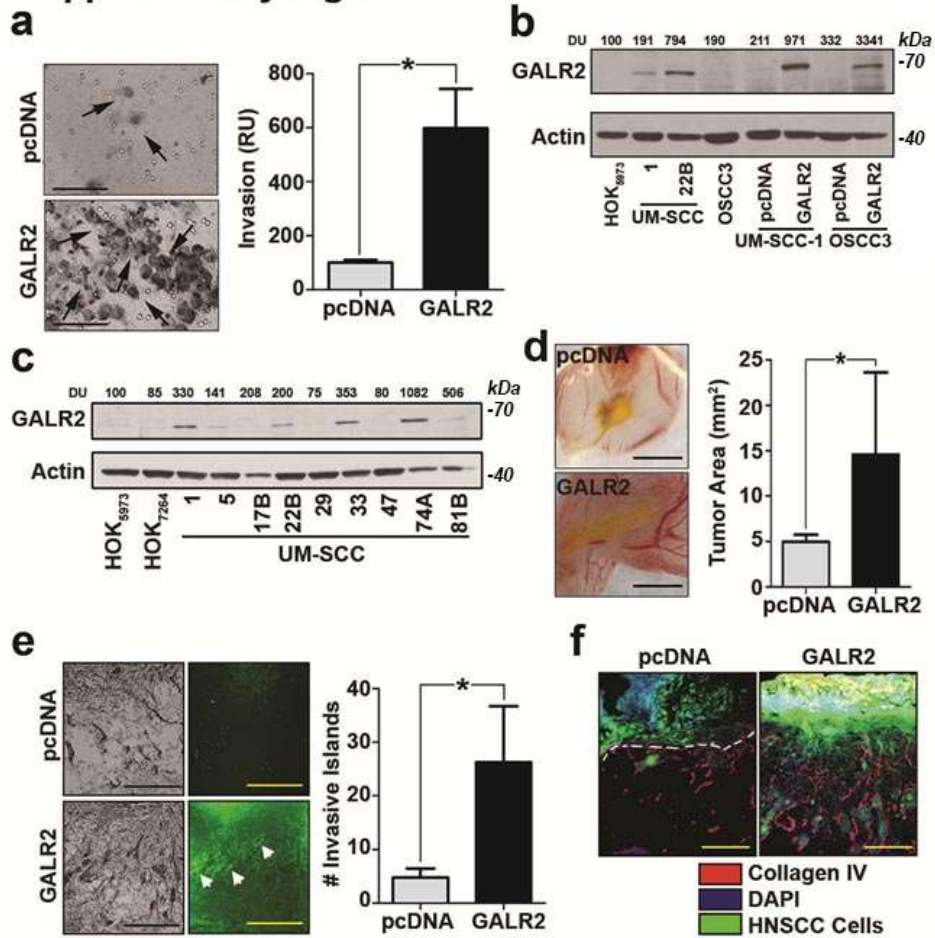

**Supplementary Figure 2. GALR2 promotes tumour invasion and metastasis.** (a) OSCC3-GALR2 cells are more invasive than control cells (OSCC3-pcDNA) in a Boyden chamber chemoinvasion assay with GAL as the chemoattractant (scale bar = 100 $\mu$ m,  $*P < 0.05$ , two sample t-test; data represent mean + SD). (b) UM-SCC-1 and OSCC3 cells were transfected with control (pcDNA) or GALR2 constructs. Whole cell lysates from these cell lines, normal keratinocytes (HOK), UM-SCC1, UM-SCC-22B and OSCC3 were electrophoresed and immunoblotted with anti-GALR2 and actin, as a loading control. (c) Whole cell lysates from normal keratinocytes (HOK) and HNSCC cell lines (UM-SCC) were immunoblotted with anti-GALR2 and actin, as a loading control. When seeded on a CAM, OSCC3-GALR2 tumours were (d) larger (scale bar = 5 mm,  $*P < 0.05$  two sample t-test; data represent mean + SD), (e) more invasive (cancer cells are labelled green, scale bar = 200 $\mu$ m), and (f) more destructive of the basement membrane (labelled with Collagen IV, scale bar = 100 $\mu$ m) than control tumours. For CAM experiments,  $n = 6$  per group. In vitro data are representative of three independent experiments with three replicates.

### Supplementary Figure 3

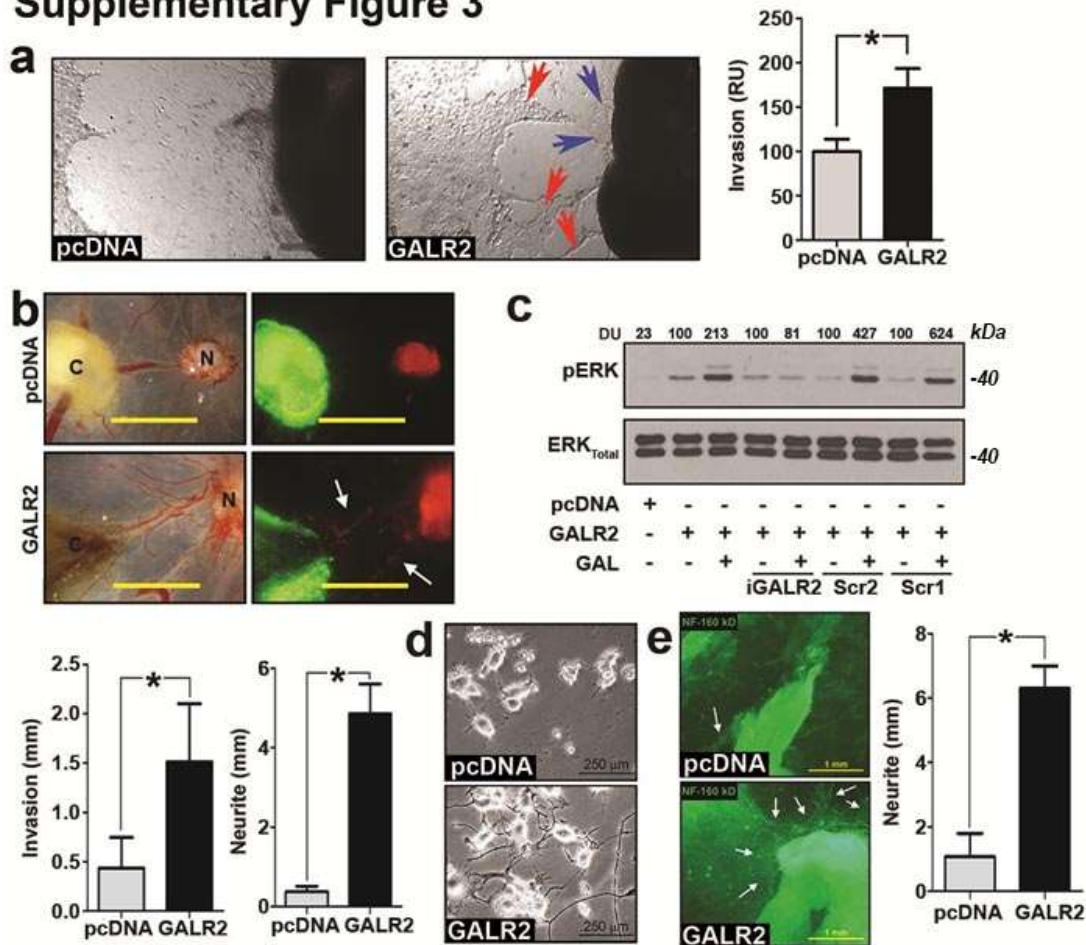

**Supplementary Figure 3. GALR2 promotes PNI.** (a) OSCC3-GALR2 cells are more invasive (red arrows) toward nerves than control cells and induce neurite outgrowth (blue arrows). (\* $P < 0.05$ , two sample t-test; data represent mean + SD). (b) On the CAM, OSCC3-GALR2 tumours (green) are more invasive and induce neurite outgrowth (red, identified with arrows, scale bar = 5mm). (c) UM-SCC-1-GALR2 cells were stimulated with Galanin (GAL) in the presence or absence of the GALR2 inhibitor, M871 (iGALR2), or a scrambled peptide. UM-SCC-1-pcDNA was used as a control. Whole cell lysates were immunoblotted with phospho-ERK and total ERK, as a loading control. (d) DRG treated with CM from OSCC3-GALR2 cells generated more neurite outgrowth than DRG treated with CM from control cells (scale bar = 250 $\mu$ m, \* $P < 0.05$ , two sample t-test; data represent mean + SD). (e) SH-SY5Y neuroblastoma cells treated with CM from OSCC3-GALR2 cells differentiated and exhibited more neurite outgrowth compared to CM from control cells (scale bar = 1mm, \* $P < 0.05$  two sample t-test; data represent mean + SD). For CAM experiments,  $n = 6$  for each group, and in vitro and nerve explant data are representative of three independent experiments with three replicates each.

### Supplementary Figure 4

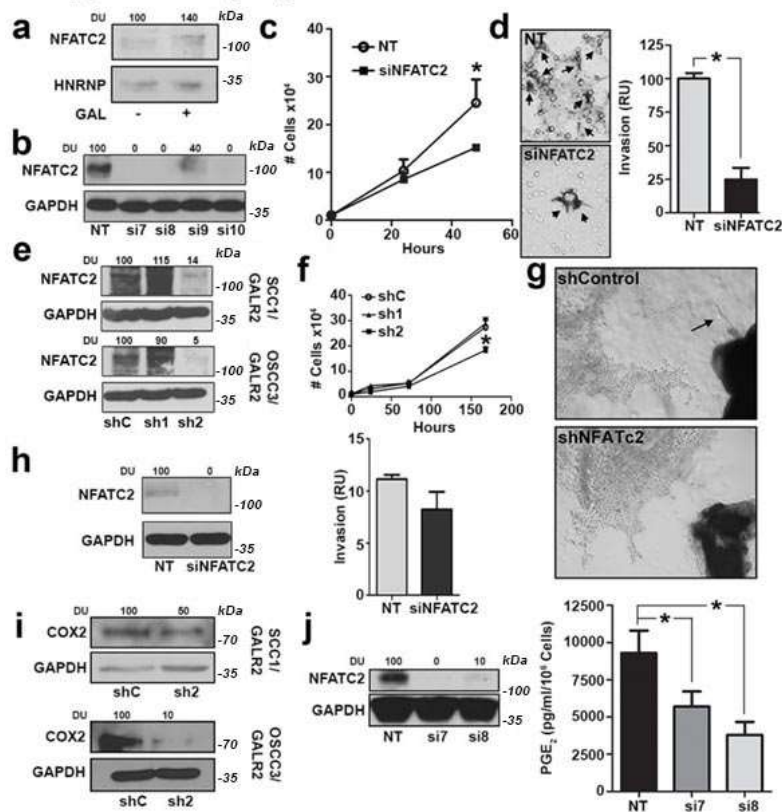

**Supplementary Figure 4. GALR2 promotes tumour progression and PNI via NFATC2.** (a) GAL treatment induces nuclear translocation of NFATC2 in OSCC3-GALR2 cells. (b) Four individual siRNAs were tested to downregulate NFATC2; si7 and si8 were selected for functional studies. OSCC3-GALR2 cells exhibit reduced (c) proliferation and (d) invasion when NFATC2 is downregulated using siRNA. (For (c) and (d) \**P* < 0.05 two sample t-test; data represent mean + SD). (e) shRNAs were tested to use for constitutive downregulation of NFATC2 in UM-SCC-1-GALR2 and OSCC3-GALR2; sh2 was selected. (f) OSCC3-GALR2-shNFATc2-2 (sh2) cells exhibit reduced proliferation whereas OSCC3-GALR2-shNFATc2-1 (sh1) with no downregulation of NFATc2 exhibited the same proliferation as OSCC3-GALR2. (\**P* < 0.05 two sample t-test; data represent mean + SD). (g) OSCC3-GALR2 cells with NFATC2 knockdown exhibit less PNI in vitro than control cells (arrow identifies neurite outgrowth in control group). (h) UM-SCC-1-pcDNA cells transfected with siNFATc2 exhibited no significant difference in invasion towards DRG than control cells. (\**P* < 0.05 two sample t-test; data represent mean + SD). (i) COX2 expression is decreased in UM-SCC-1-GALR2 and OSCC3-GALR2 cells with constitutive knockdown of NFATC2. (j) When NFATC2 is downregulated with siRNA in OSCC3-GALR2 cells, PGE<sub>2</sub> secretion decreases. (\**P* < 0.05 two sample t-test; data represent mean + SD). For CAM experiments, n = 6 per group. In vitro and DRG explant data are representative of three independent experiments with three replicates each.

## Supplementary Figure 5

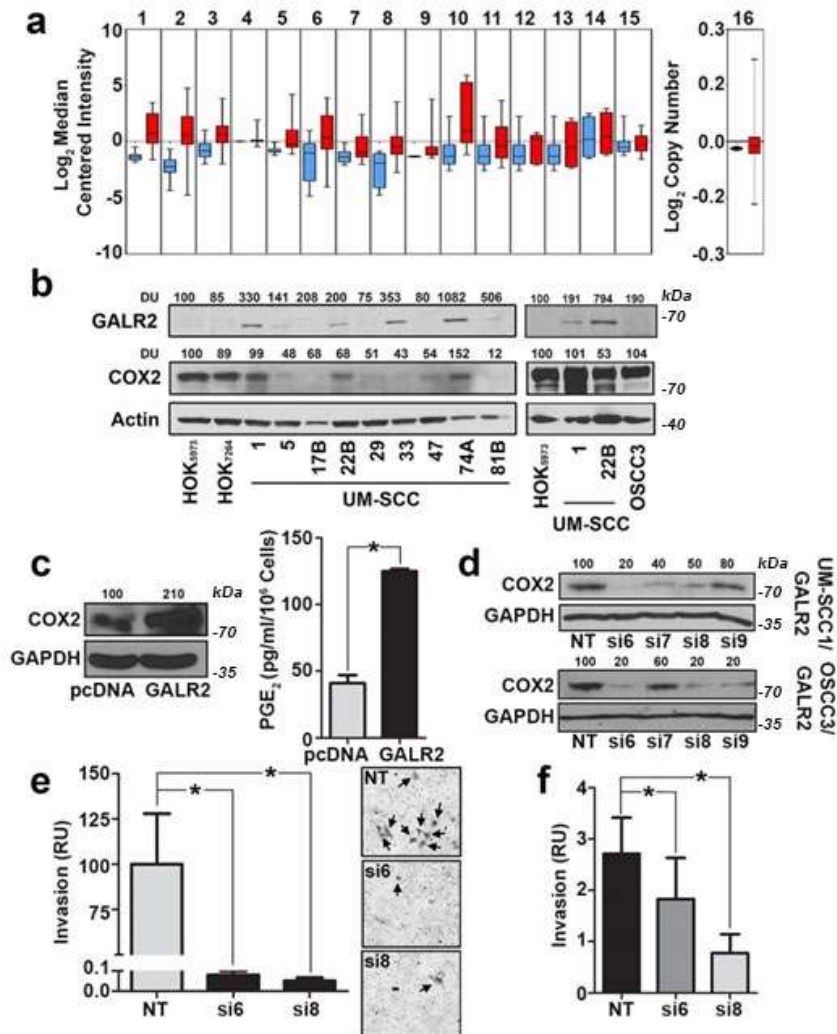

**Supplementary Figure 5. COX2 is highly expressed in HNSCC and mediates GALR2-induced invasion.** (a) A meta-analysis of HNSCC studies on Oncomine™ shows that COX2 is highly expressed in cancer versus normal (non-cancer) samples (one sample t-test of dichotomized results against the hypothetical mean of 0.05,  $P < 0.0001$ ). (b) COX2 does not correlate with GALR2 in normal keratinocytes and HNSCC cell lines. The actin and GALR2 panels from Supplementary Fig. 2c are shown again for normalization and comparison, respectively. (c) OSCC3-GALR2 cells express more COX2 and secrete more PGE<sub>2</sub> than control cells (left, immunoblot of whole cell lysates; right, ELISA of CM). ( $*P < 0.05$  two sample t-test; data represent mean + SD). (d) Four individual siRNAs were tested in UM-SCC-1-GALR2 and OSCC3-GALR2 cells; si6 and si8 were selected. (e and f) Downregulation of COX2 in OSCC3-GALR2 cells using siRNA decreases invasion in a Boyden chamber assay (e) and also decreases invasion toward nerves in co-culture (f). ( $*P < 0.05$  two sample t-test; data represent mean + SD). In vitro and nerve explant data are representative of three independent experiments each with three replicates.

Supplementary Figure 6

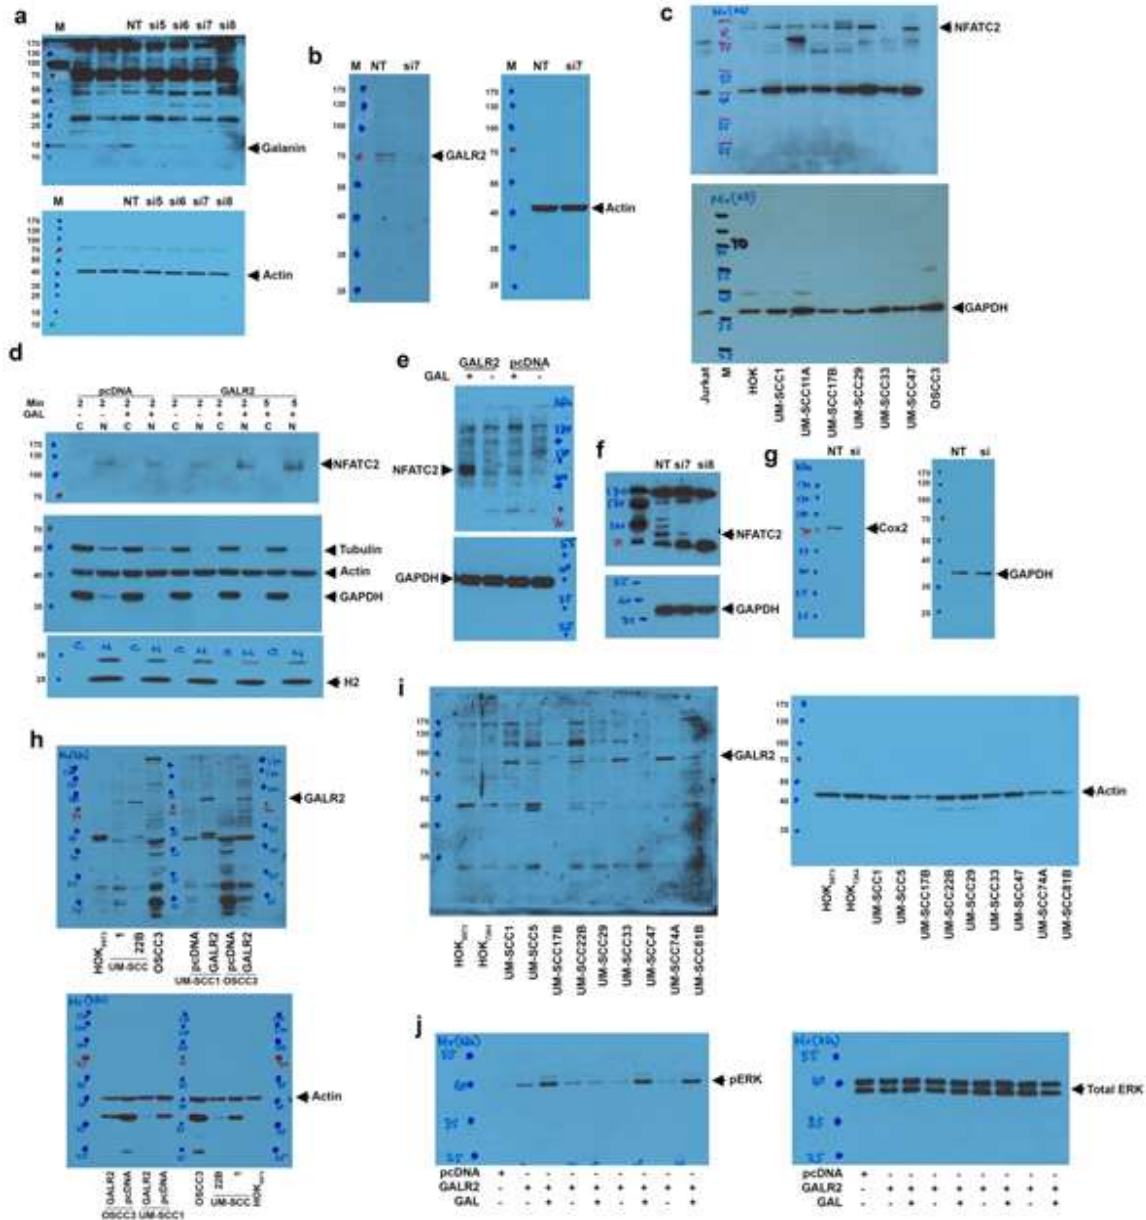

**Supplementary Figure 6:** Scanned films for: **(a)** Fig. 2b. **(b)** Fig. 3c. **(c)** Fig. 5a-upper left panel. **(d)** Fig. 5a-upper right panel. **(e)** Fig. 5a-lower left panel (Note: flipped in Fig. 5a-lower panel to put pcDNA control on left). **(f)** Fig. 5i. **(g)** Fig. 6e. **(h)** Supplementary Fig. 2b (Note: actin inverted in Supplementary Fig. 2b to correspond with samples). **(i)** Supplementary Fig. 2c. **(j)** Used for Supplementary Fig. 3c

**Supplementary Figure 7**

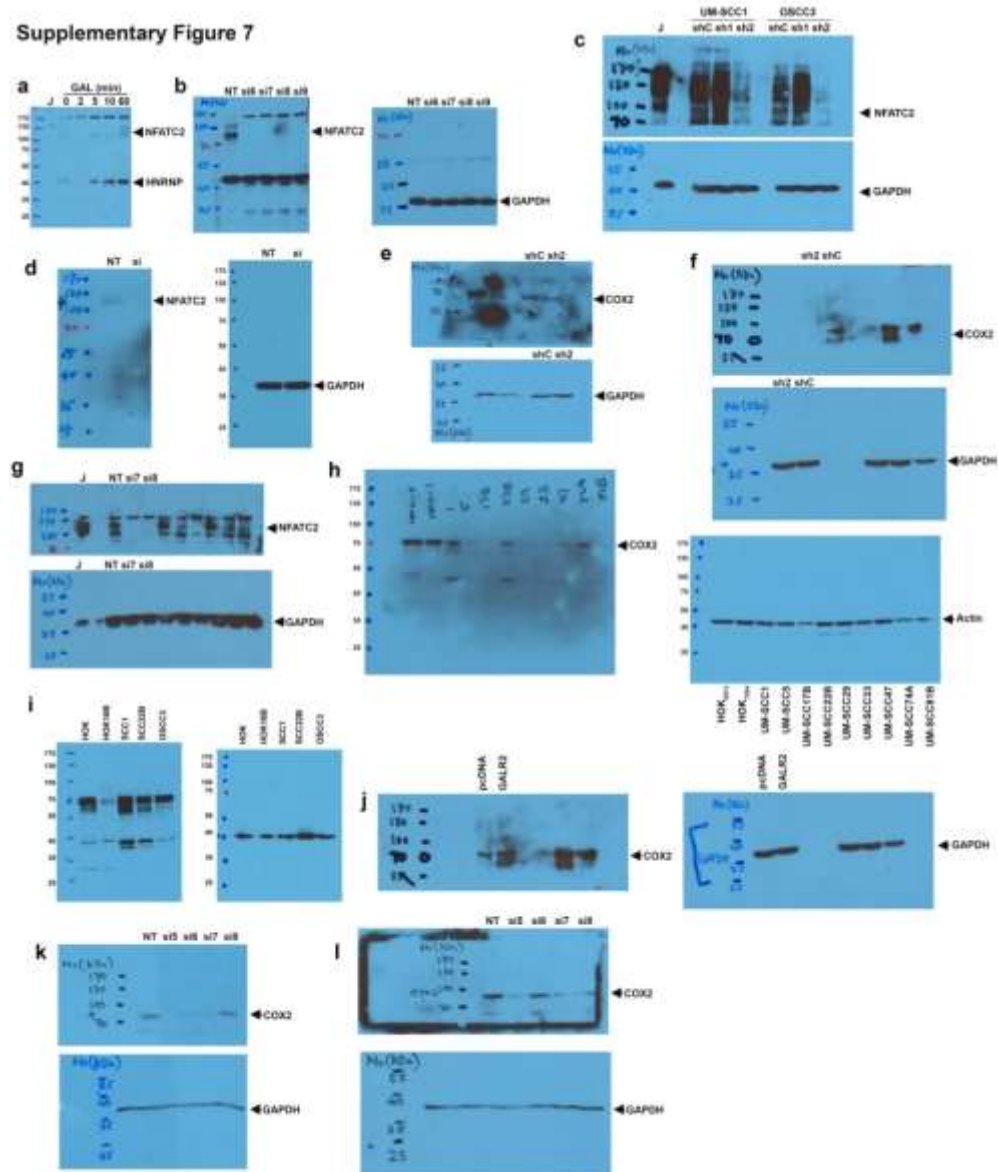

**Supplementary Figure 7:** Scanned films for: (a) Supplementary Fig. 4a. (b) Supplementary Fig. 4b. (c) Supplementary Fig. 4. (d) Supplementary Fig. 4h. (e) Supplementary Fig. 4i-upper panel (f) Supplementary Fig. 4i-lower panel (g) Supplementary Fig. 4j. (h) Supplementary Fig. 5b. (Note: the actin and GALR2 in Supplementary Fig. 5b left panel are from blots in Figs. 6h and 6i since these two panels were shown initially in Fig. 2b and 2c and again in Fig. 5b for comparison to COX2). (i) Supplemental Fig. 5b, right panel. (j) Supplementary Fig. 5c. (k) Supplementary Fig. 5d-upper panel. (l) Supplementary Fig. 5d-lower panel.

## Supplementary Tables

**Supplementary Table 1:**

| Study Number | Accession Number    | Name                                | Link to Data                                                                                                                                                                                                                       | Reference                                                                                                                                                                                                                                                                             | Normal Tissues                |
|--------------|---------------------|-------------------------------------|------------------------------------------------------------------------------------------------------------------------------------------------------------------------------------------------------------------------------------|---------------------------------------------------------------------------------------------------------------------------------------------------------------------------------------------------------------------------------------------------------------------------------------|-------------------------------|
| 1            | GSE12452            | Sengupta Head Neck                  | <a href="http://www.ncbi.nlm.nih.gov/geo/query/acc.cgi?acc=GSE12452">http://www.ncbi.nlm.nih.gov/geo/query/acc.cgi?acc=GSE12452</a>                                                                                                | Sengupta, S., den Boon, J. A., Chen, I. H., Newton, M. A., Dahl, D. B., Chen, M., et al. (2006). Genome-wide expression profiling reveals EBV-associated inhibition of MHC class I expression in nasopharyngeal carcinoma. <i>Cancer Research</i> , 66(16), 7999-8006.                | Nasopharyngeal                |
| 2            | No Accession Number | Ginos Head Neck                     | <a href="http://cancers.aacrjournals.org/content/64/1/55.long">http://cancers.aacrjournals.org/content/64/1/55.long</a>                                                                                                            | Ginos, M. A., Page, G. P., Michalowicz, B. S., Patel, K. J., Volker, S. E., Pambuccian, S. E., et al. (2004). Identification of a gene expression signature associated with recurrent disease in squamous cell carcinoma of the head and neck. <i>Cancer Research</i> , 64(1), 55-63. | Buccal mucosa                 |
| 3            | GSE25099            | Peng Head Neck                      | <a href="http://www.ncbi.nlm.nih.gov/geo/query/acc.cgi?acc=GSE25099">http://www.ncbi.nlm.nih.gov/geo/query/acc.cgi?acc=GSE25099</a>                                                                                                | Peng, C., Liao, C., Peng, S., Chen, Y., Cheng, A., Juang, J., et al. (2011). A novel molecular signature identified by systems genetics approach predicts prognosis in oral squamous cell carcinoma. <i>PloS One</i> , 6(8), e23452.                                                  | Oral Cavity                   |
| 4            | GSE55543            | TCGA Head Neck                      | <a href="http://tcga-data.nci.nih.gov/tcga/">http://tcga-data.nci.nih.gov/tcga/</a><br><br><a href="http://qdac.broadinstitute.org/runs/stddata_2013_09_23/data/">http://qdac.broadinstitute.org/runs/stddata_2013_09_23/data/</a> | No associated paper – see: <a href="https://tcga-data.nci.nih.gov/tcga/">https://tcga-data.nci.nih.gov/tcga/</a> .                                                                                                                                                                    | Blood and Head and Neck Parts |
| 5            | GSE9844             | Ye Head Neck                        | <a href="http://www.ncbi.nlm.nih.gov/geo/query/acc.cgi?acc=GSE9844">http://www.ncbi.nlm.nih.gov/geo/query/acc.cgi?acc=GSE9844</a>                                                                                                  | Ye, H., Yu, T., Temam, S., Ziober, B. L., Wang, J., Schwartz, J. L., et al. (2008). Transcriptomic dissection of tongue squamous cell carcinoma. <i>BMC Genomics</i> , 9, 69-2164-9-69.                                                                                               | Tongue squamous cells         |
| 6            | GSE13601            | Estilo Head Neck                    | <a href="http://www.ncbi.nlm.nih.gov/geo/query/acc.cgi?acc=GSE13601">http://www.ncbi.nlm.nih.gov/geo/query/acc.cgi?acc=GSE13601</a>                                                                                                | Estilo, C. L., Pornchai, O., Talbot, S., Succi, N. D., Carlson, D. L., Ghossein, R., et al. (2009). Oral tongue cancer gene expression profiling: Identification of novel potential prognosticators by oligonucleotide microarray analysis. <i>BMC Cancer</i> , 9(1), 11.             | Paired normal tongue          |
| 7            | GSE3524             | Talbot Lung (Head and neck dataset) | <a href="http://www.ncbi.nlm.nih.gov/pubmed/15833835?dopt=Abstract">http://www.ncbi.nlm.nih.gov/pubmed/15833835?dopt=Abstract</a>                                                                                                  | Talbot, S. G., Estilo, C., Maghami, E., Sarkaria, I. S., Pham, D. K., O-charoenrat, P., et al. (2005). Gene expression profiling allows distinction between primary and metastatic squamous cell carcinomas in the lung. <i>Cancer Research</i> , 65(8), 3063-3071.                   | Lung and Tongue               |
| 8            | GSE2379             | Cromer Head Neck                    | <a href="http://www.ncbi.nlm.nih.gov/geo/query/acc.cgi?acc=GSE2379">http://www.ncbi.nlm.nih.gov/geo/query/acc.cgi?acc=GSE2379</a>                                                                                                  | Cromer, A., Carles, A., Millon, R., Ganguli, G., Chalmel, F., Lemaire, F., et al. (2004). Identification of genes associated with tumorigenesis and metastatic potential of hypopharyngeal cancer by microarray analysis. <i>Oncogene</i> , 23(14), 2484-2498.                        | Uvula                         |



|    |          |                                             |                                                                                                                                     |                                                                                                                                                                                                                                                                                                          |                            |
|----|----------|---------------------------------------------|-------------------------------------------------------------------------------------------------------------------------------------|----------------------------------------------------------------------------------------------------------------------------------------------------------------------------------------------------------------------------------------------------------------------------------------------------------|----------------------------|
| 9  | GSE3524  | Toruner Head Neck                           | <a href="http://www.ncbi.nlm.nih.gov/geo/query/acc.cgi?acc=GSE3524">http://www.ncbi.nlm.nih.gov/geo/query/acc.cgi?acc=GSE3524</a>   | Toruner, G. A., Ulger, C., Alkan, M., Galante, A. T., Rinaggio, J., Wilk, R., et al. (2004). Association between gene expression profile and tumor invasion in oral squamous cell carcinoma. <i>Cancer Genetics and Cytogenetics</i> , 154(1), 27-35.                                                    | Normal squamous cells      |
| 10 | GSE6791  | Pyeon Multi-Cancer: Oropharyngeal Carcinoma | <a href="http://www.ncbi.nlm.nih.gov/geo/query/acc.cgi?acc=GSE6791">http://www.ncbi.nlm.nih.gov/geo/query/acc.cgi?acc=GSE6791</a>   | Pyeon, D., Newton, M. A., Lambert, P. F., den Boon, J. A., Sengupta, S., Marsit, C. J., et al. (2007). Fundamental differences in cell cycle deregulation in human papillomavirus-positive and human papillomavirus-negative head/neck and cervical cancers. <i>Cancer Research</i> , 67(10), 4605-4619. | Oral Tissues               |
| 11 | GSE6791  | Pyeon Multi-Cancer: Tongue Carcinoma        | <a href="http://www.ncbi.nlm.nih.gov/geo/query/acc.cgi?acc=GSE6791">http://www.ncbi.nlm.nih.gov/geo/query/acc.cgi?acc=GSE6791</a>   | Pyeon, D., Newton, M. A., Lambert, P. F., den Boon, J. A., Sengupta, S., Marsit, C. J., et al. (2007). Fundamental differences in cell cycle deregulation in human papillomavirus-positive and human papillomavirus-negative head/neck and cervical cancers. <i>Cancer Research</i> , 67(10), 4605-4619. | Oral Tissues               |
| 12 | GSE6791  | Pyeon Multi-Cancer: Floor of the Mouth      | <a href="http://www.ncbi.nlm.nih.gov/geo/query/acc.cgi?acc=GSE6791">http://www.ncbi.nlm.nih.gov/geo/query/acc.cgi?acc=GSE6791</a>   | Pyeon, D., Newton, M. A., Lambert, P. F., den Boon, J. A., Sengupta, S., Marsit, C. J., et al. (2007). Fundamental differences in cell cycle deregulation in human papillomavirus-positive and human papillomavirus-negative head/neck and cervical cancers. <i>Cancer Research</i> , 67(10), 4605-4619. | Oral Tissues               |
| 13 | GSE6791  | Pyeon Multi-Cancer: Oral Cavity Carcinoma   | <a href="http://www.ncbi.nlm.nih.gov/geo/query/acc.cgi?acc=GSE6791">http://www.ncbi.nlm.nih.gov/geo/query/acc.cgi?acc=GSE6791</a>   | Pyeon, D., Newton, M. A., Lambert, P. F., den Boon, J. A., Sengupta, S., Marsit, C. J., et al. (2007). Fundamental differences in cell cycle deregulation in human papillomavirus-positive and human papillomavirus-negative head/neck and cervical cancers. <i>Cancer Research</i> , 67(10), 4605-4619. | Oral Tissues               |
| 14 | GSE1722  | Schlingemann Head Neck                      | <a href="http://www.ncbi.nlm.nih.gov/geo/query/acc.cgi?acc=GSE1722">http://www.ncbi.nlm.nih.gov/geo/query/acc.cgi?acc=GSE1722</a>   | Schlingemann, J., Habtemichael, N., Ittrich, C., Toedt, G., Kramer, H., Hambek, M., et al. (2005). Patient-based cross-platform comparison of oligonucleotide microarray expression profiles. <i>Laboratory Investigation</i> , 85(8), 1024-1039.                                                        | Hypopharynx and Oropharynx |
| 15 | GDS2520  | Kuriakose Head Neck                         | <a href="http://www.ncbi.nlm.nih.gov/geo/query/acc.cgi?acc=GSE6631">http://www.ncbi.nlm.nih.gov/geo/query/acc.cgi?acc=GSE6631</a>   | Kuriakose, M., Chen, W., He, Z., Sikora, A., Zhang, P., Zhang, Z., et al. (2004). Selection and validation of differentially expressed genes in head and neck cancer. <i>Cellular and Molecular Life Sciences CMLS</i> , 61(11), 1372-1383.                                                              | Oral Mucosa                |
| 16 | GSE25103 | Peng Head Neck 2                            | <a href="http://www.ncbi.nlm.nih.gov/geo/query/acc.cgi?acc=GSE25103">http://www.ncbi.nlm.nih.gov/geo/query/acc.cgi?acc=GSE25103</a> | Peng, C., Liao, C., Peng, S., Chen, Y., Cheng, A., Juang, J., et al. (2011). A novel molecular signature identified by systems genetics approach predicts prognosis in oral squamous cell carcinoma. <i>PLoS One</i> , 6(8), e23452.                                                                     | Oral Cavity                |

**Supplementary Table 1:** Information about studies in meta-analyses.

**Supplementary Table 2: Meta-analysis of GAL.**

| Study                        | t-Test (df) | P-Value  | Normal/Cancer Samples |
|------------------------------|-------------|----------|-----------------------|
| 1) Sengupta Head-Neck        | 2.038 (39)  | 0.024    | 10/31                 |
| 2) Ginos Head-Neck           | 1.347 (52)  | 0.092    | 13/41                 |
| 3) Peng Head-Neck            | 0.085 (77)  | 0.466    | 22/57                 |
| 4) TCGA Head-Neck            | 7.889 (817) | 1.61e-14 | 434/385               |
| 5) Ye Head-Neck              | 2.596 (36)  | 0.007    | 12/26                 |
| 6) Estilo Head-Neck          | 1.66 (55)   | 0.051    | 26/31                 |
| 7) Talbot Lung               | -0.194 (91) | 0.577    | 28/31                 |
| 8) Cromer Head-Neck          | 2.258 (36)  | 0.048    | 4/34                  |
| 9) Toruner Head-Neck         | 0.105 (18)  | 0.46     | 4/16                  |
| 10) Pyeon Oropharyngeal      | 0.796 (26)  | 0.224    | 22/6                  |
| 11) Pyeon Tongue             | 2.303 (35)  | 0.014    | 22/15                 |
| 12) Pyeon Floor of the Mouth | 1.283 (25)  | 0.134    | 22/5                  |
| 13) Pyeon Oral Cavity        | 0.753 (24)  | 0.252    | 22/4                  |
| 14) Schlingemann Head-Neck   | 1.601 (6)   | 0.08     | 4/4                   |
| 15) Kuriakose Head-Neck      | 2.421 (23)  | 0.06     | 22/3                  |
| 16) Peng Head-Neck 2         | 4.902 (120) | 1.75e-6  | 10/112                |
| Meta-Analysis                | 2.6 (15)    | 0.01005  | NA                    |

**Supplementary Table 2: GAL expression is upregulated in HNSCC relative to normal tissue.** Individual HNSCC studies examined the difference in GAL expression between normal and cancer tissues with two sample t-tests. The meta-analysis was then conducted as a one sample t-test comparing the proportion of studies that were statistically significant at the 0.05 level with the proportion of studies expected to be significant at the 0.05 level. The *P*-value resulting from this meta-analysis was 0.01, sufficiently extreme to reject the null hypothesis that there was no relationship between GAL expression and tissue cancer status.

**Supplementary Table 3:** Summary information about studies for Supplementary Fig. 1a.

| Analysis Type by Cancer | Clinical Outcome |   | Recurrence | Total Number of Analyses | Number of Studies | Sample Number: Smallest study | Sample Number: Largest study | Sample Number: Mean | Total Patients across studies |
|-------------------------|------------------|---|------------|--------------------------|-------------------|-------------------------------|------------------------------|---------------------|-------------------------------|
| Bladder Cancer          | 2                |   |            | 17                       | 5                 | 9                             | 288                          | 135.4               | 677                           |
| Brain and CNS Cancer    |                  |   |            | 56                       | 15                | 29                            | 1531                         | 213.13              | 3197                          |
| Breast Cancer           | 17               | 1 |            | 129                      | 26                | 40                            | 2136                         | 395.10              | 10275                         |
| Cervical Cancer         | 1                |   |            | 4                        | 3                 | 66                            | 301                          | 155.67              | 467                           |
| Colorectal Cancer       | 2                |   |            | 35                       | 10                | 48                            | 1172                         | 229.7               | 2297                          |
| Esophageal Cancer       |                  |   |            | 2                        | 1                 | 40                            | 40                           | 40                  | 40                            |
| Gastric Cancer          |                  |   |            | 28                       | 3                 | 132                           | 637                          | 303.33              | 910                           |
| Head and Neck Cancer    | 4                |   | 1          | 34                       | 4                 | 38                            | 1012                         | 488.25              | 1953                          |
| Kidney Cancer           | 1                |   |            | 19                       | 4                 | 34                            | 1463                         | 440.5               | 1762                          |
| Leukemia                |                  |   |            | 18                       | 15                | 12                            | 161                          | 46.07               | 645                           |
| Liver Cancer            |                  |   |            | 17                       | 4                 | 52                            | 292                          | 161.75              | 647                           |
| Lung Cancer             | 6                | 1 |            | 81                       | 14                | 51                            | 2058                         | 304.141             | 4258                          |
| Lymphoma                | 6                | 1 |            | 50                       | 11                | 22                            | 414                          | 142.09              | 1563                          |
| Melanoma                | 3                | 1 |            | 10                       | 2                 | 63                            | 154                          | 108.5               | 217                           |
| Myeloma                 | 1                |   |            | 6                        | 3                 | 65                            | 414                          | 247.67              | 743                           |
| Other Cancer            |                  |   |            | 16                       | 9                 | 25                            | 1602                         | 469.33              | 4224                          |
| Ovarian Cancer          |                  |   |            | 25                       | 7                 | 50                            | 1168                         | 362.141             | 2535                          |
| Pancreatic Cancer       |                  |   |            | 5                        | 2                 | 27                            | 131                          | 79                  | 158                           |
| Prostate Cancer         |                  |   |            | 18                       | 8                 | 54                            | 380                          | 192.63              | 1541                          |
| Sarcoma                 | 1                |   |            | 10                       | 4                 | 14                            | 165                          | 58.25               | 233                           |
| Significant Analyses    | 43               | 5 | 1          |                          |                   |                               |                              |                     |                               |
| Total Analyses          | 579              |   | 24         |                          |                   |                               |                              |                     |                               |

**Supplementary Table 3:** Summary information about studies for Supplementary Fig. 1a.

**Supplementary Table 4: Meta-analysis of COX2.**

| <b>Study</b>                 | <b>t-Test (df)</b> | <b>P-Value</b> | <b>Normal/Cancer Samples</b> |
|------------------------------|--------------------|----------------|------------------------------|
| 1) Sengupta Head-Neck        | 8.061 (39)         | 4.42e-10       | 10/31                        |
| 2) Ginos Head-Neck           | 8.141 (52)         | 2.42e-10       | 13/41                        |
| 3) Peng Head-Neck            | 6.236 (77)         | 2.58e-8        | 22/57                        |
| 4) TCGA Head-Neck            | 7.427 (817)        | 2.68e-13       | 434/385                      |
| 5) Ye Head-Neck              | 4.093 (36)         | 1.56e-4        | 12/26                        |
| 6) Estilo Head-Neck          | 4.826 (56)         | 5.97e-6        | 26/32                        |
| 7) Talbot Lung               | 4.038 (57)         | 1.2e-4         | 28/31                        |
| 8) Cromer Head-Neck          | 2.413 (36)         | 0.042          | 4/34                         |
| 9) Toruner Head-Neck         | 2.17 (18)          | 0.022          | 4/16                         |
| 10) Pyeon Oropharyngeal      | 2.864 (26)         | 0.017          | 22/6                         |
| 11) Pyeon Tongue             | 2.877 (35)         | 0.005          | 22/15                        |
| 12) Pyeon Floor of the Mouth | 1.355 (25)         | 0.118          | 22/5                         |
| 13) Pyeon Oral Cavity        | 0.971 (24)         | 0.2            | 22/4                         |
| 14) Schlingemann Head-Neck   | 0.226 (6)          | 0.415          | 4/4                          |
| 15) Kuriakose Head-Neck      | -2.008 (23)        | 0.969          | 22/3                         |
| 16) Peng Head-Neck 2         | 2.051 (120)        | 0.021          | 10/112                       |
| Meta-Analysis                | 6.261 (15)         | 0.0001         | NA                           |

**Supplementary Table 4: COX2 expression is upregulated in HNSCC relative to normal tissue.** The individual studies in Oncomine<sup>TM</sup> examined the difference with two sample t-tests comparing COX2 expression in normal and cancerous tissues. The meta-analysis was conducted as a one sample t-test comparing the proportion of studies that were statistically significant at the 0.05 level. The *P*-value from the meta-analysis was 0.0001, sufficiently extreme to reject the null hypothesis that there was no relationship between COX2 expression and tissue cancer status.

**Supplementary Table 5:**

| <b>Gender</b>                 |    |
|-------------------------------|----|
| Male                          | 8  |
| Female                        | 4  |
| <b>Age</b>                    |    |
| <50 years                     | 1  |
| 50 years – 70 years           | 8  |
| >70 years                     | 3  |
| <b>Location(s)</b>            |    |
| Tongue                        | 7  |
| Lateral                       | 5  |
| Ventral                       | 2  |
| Dorsal                        | 1  |
| Inferior                      | 1  |
| Floor of the mouth            | 3  |
| Buccal mucosa                 | 2  |
| Palate                        | 1  |
| <b>Diagnoses</b>              |    |
| Well differentiated SCC       | 10 |
| Moderately differentiated SCC | 1  |
| Poorly differentiated SCC     | 1  |

**Supplementary Table 5:** Clinical data for human HNSCC specimens.

**Supplementary Table 6:**

|                               |                                                                                                                   |
|-------------------------------|-------------------------------------------------------------------------------------------------------------------|
| <b><i>NFATC2 (NFATC2)</i></b> | si7 – GCUUAGAAACGCCGACAUU<br>si8 – AGACGGAGCCCACGGAUGA<br>si9 – GCAGAAUCGUCUCUUUACA<br>si10 – GAACCUCGCCAAUAAUGUC |
| <b><i>PTGS2 (COX2)</i></b>    | si6 – GGACUUAUGGGUAAUGUUA<br>si7 – GAUAAUUGAUGGAGAGAUG<br>si8 – GUGAAACUCUGGCUAGACA<br>si9 – CGAAAUGCAAUUAUGAGUU  |
| <b><i>GAL</i></b>             | si5 – AAACGAGGCUGGACCCUGA<br>si6 – CAGAAGACAUCGAGCGGUC<br>si7 – AGAAUGGCCUCACCAGCAA<br>si8 –UAUCAUGCGCACAAUCAUU   |
| <b><i>GALR2</i></b>           | si7 – UCUCGCACCUGGUCUCCUA                                                                                         |

**Supplementary Table 6:** siRNA target sequences for NFATC2 PTGS2 (COX2), Galanin (GAL) and GALR2 (Dharmacon) used in this study.

**Supplementary Table 7:**

|                                                                                              |                                                                                                                                                                                                                      |
|----------------------------------------------------------------------------------------------|----------------------------------------------------------------------------------------------------------------------------------------------------------------------------------------------------------------------|
| <b><i>PTGS (COX2)</i></b>                                                                    | F1, 5'-GAATTTACCTTTCCCGCCTCTC-3'<br>R1, 5'-AAGCCCGGTGGGGGCAGGGTTT-3'<br>F2, 5'-GAAGCCAAGTGTCTTCTGC-3'<br>R2, 5'-GGAGAGGGAGGGATCAGAC-3'<br>F3, 5'-AAGGCATACGTTTTGGACATTTAGC-3'<br>R3, 5'-CTTTATATTGGTGACCCGTGGAGCT-3' |
| <b><i>GAL (GAL)</i></b>                                                                      | F1, 5'-TTCGGGATTAGGGTCTCTCC-3'<br>R1, 5'-GGTCCTCTGGGCCATCATAG-3'<br>F2, 5'-CTATGATGGCCCAGAGGACC-3'<br>R2, 5'-GGCGCCAGTAGTACCTTGAG-3'<br>F3, 5'-CTATGATGGCCCAGAGGACC-3'<br>R3, 5'-ATATGCGGCGCACCCGGGAGCC-3'           |
| <b><i>GAL (GAL)</i></b><br><br><b><i>GAPDH</i></b><br><br><b><i>(Expression Primers)</i></b> | F, 5'-GCGCACAATCATTGAGTTTC-3'<br>R, 5'-GGCAAAGAGAACAGGAATGG-3'<br>F, 5'-GCGAGATCCCTCCAAAATCAA'3<br>R, 5'-GTTCACACCCATGACGAACAT'3.                                                                                    |

**Supplementary Table 7:** Primer pairs used in the ChIP Assay and PCR.

## REFERENCES

1. Cromer A, *et al.* Identification of genes associated with tumorigenesis and metastatic potential of hypopharyngeal cancer by microarray analysis. *Oncogene* **23**, 2484-2498 (2004).
2. Estilo CL, *et al.* Oral tongue cancer gene expression profiling: Identification of novel potential prognosticators by oligonucleotide microarray analysis. *BMC cancer* **9**, 11 (2009).
3. Ginos MA, *et al.* Identification of a gene expression signature associated with recurrent disease in squamous cell carcinoma of the head and neck. *Cancer research* **64**, 55-63 (2004).
4. Kuriakose MA, *et al.* Selection and validation of differentially expressed genes in head and neck cancer. *Cellular and molecular life sciences : CMLS* **61**, 1372-1383 (2004).
5. Peng CH, *et al.* A novel molecular signature identified by systems genetics approach predicts prognosis in oral squamous cell carcinoma. *PloS one* **6**, e23452 (2011).
6. Pyeon D, *et al.* Fundamental differences in cell cycle deregulation in human papillomavirus-positive and human papillomavirus-negative head/neck and cervical cancers. *Cancer research* **67**, 4605-4619 (2007).
7. Schlingemann J, *et al.* Patient-based cross-platform comparison of oligonucleotide microarray expression profiles. *Laboratory investigation; a journal of technical methods and pathology* **85**, 1024-1039 (2005).
8. Sengupta S, *et al.* Genome-wide expression profiling reveals EBV-associated inhibition of MHC class I expression in nasopharyngeal carcinoma. *Cancer research* **66**, 7999-8006 (2006).
9. Talbot SG, *et al.* Gene expression profiling allows distinction between primary and metastatic squamous cell carcinomas in the lung. *Cancer research* **65**, 3063-3071 (2005).
10. Toruner GA, *et al.* Association between gene expression profile and tumor invasion in oral squamous cell carcinoma. *Cancer genetics and cytogenetics* **154**, 27-35 (2004).
11. Ye H, *et al.* Transcriptomic dissection of tongue squamous cell carcinoma. *BMC genomics* **9**, 69 (2008).
